# Supplementary material
Source: PubMed Central journal article supplement (PMC5485859)

## Supplemental Figure Legends

### **Figure S1. Alignment of HSP90 sequences from representative species and homologs, Related to Figure 1**

The N-terminal domain amino acid sequences of HSP90 family members. T5,7 are highlighted with boxes, and the extreme N-terminus (ENT) region (a.a. 1-11), in gray.

### **Figure S2. p-HSP90 $\alpha$ did not increase with aging in the lung, Related to Figure 1**

HSP90 $\alpha$  phosphorylation in lung of young (3 mo) and old (24 mo) mice (in arbitrary units) (n=5 each group). Quantification is shown on the right. All values are expressed as mean  $\pm$  s.e.m.

### **Figure S3. DNA-PK inhibition did not increase DNA DSBs, Related to Figure 5**

(A) H2AX phosphorylation ( $\gamma$ -H2AX) in resting muscle isolated from young (2 months old) and old (18 mo) WT and SCID mice (n=3 each group). Quantification is shown on the right. All values are expressed as mean  $\pm$  s.e.m.: \*,  $p < 0.05$ . (B) H2AX phosphorylation ( $\gamma$ -H2AX) in resting skeletal muscle isolated from 17 months old fl/fl and muscle specific DNA-PK knockout (MDPKO) mice. Quantification is shown on the right. All values are expressed as mean  $\pm$  s.e.m. (C) H2AX phosphorylation ( $\gamma$ -H2AX) in resting skeletal muscle isolated from WT and AMPK $\alpha$ 2 knockout mice fed either vehicle or DNA-PKcs inhibitor. Quantification is shown on the right. All values are expressed as mean  $\pm$  s.e.m. (D) H2AX phosphorylation ( $\gamma$ -H2AX) in resting skeletal muscle isolated from middle age (MA) mice treated with either vehicle or DNA-PKcs inhibitor. Quantification is shown on the right. All values are expressed as mean  $\pm$  s.e.m.

### **Figure S4. DNA-PK inhibition increases skeletal muscle mitochondrial function, Related to Figure 5**

(A) VO<sub>2</sub> of WT and SCID mice skeletal muscle mitochondria in states 2, 3, 4 and RC (n=6 per each genotype) All values are given as mean  $\pm$  s.e.m. Mann-Whitney Test: \*,  $p < 0.05$ . (B) Running distance before exhaustion during three consecutive days of treadmill running for middle-age (MA) and HFD-fed (Ob, for 3-4 months) WT and SCID mice (n=5-9 for each group). All values are given as mean  $\pm$  s.e.m. Mann-Whitney Test: \*,  $p < 0.05$ ; \*\*,  $p < 0.01$  between WT and SCID values.

**Figure S5. Metabolic function of DNA-PK is not immune-related, Related to Figure 5**

(A) Relative mRNA levels of PGC-1 $\alpha$  and PPAR $\delta$  in skeletal muscle (M), WAT (W), BAT (B) and liver (L) of HFD-fed WT and Rag1 $^{-/-}$  mice are shown. The mRNA levels were measured using real-time PCR and are expressed in arbitrary units (A.U.) (n=3 per genotype). Results were shown as mean  $\pm$  s.e.m. (B) The distance (in meters) lean (RCD) and HFD-fed (HFD, for 3-4 months) WT and Rag1 $^{-/-}$  mice ran on the treadmill before exhaustion (n=5 per each genotype). Results were shown as mean  $\pm$  s.e.m.

**Figure S6. Scid mice are protected against obesity and insulin resistance, Related to Figure 6**

(A) Weight gain of WT (black symbols) and SCID (white symbols) littermates fed regular chow diet (RCD) as a function of the time on the diet (n=5-8 per genotype). All values are expressed as mean  $\pm$  s.e.m. (B) Weight gain of WT (black symbols) and SCID (white symbols) littermates fed high fat diet (HFD, 60% fat by calories) as a function of the time on the diet (n=5-7 per genotype). All values are expressed as mean  $\pm$  s.e.m. \*\*,  $p < 0.01$  (Two-way repeated measures Anova) between WT and SCID mice. (C) Food intake for WT and SCID mice (n=5-7 per each genotype). All values are expressed as mean  $\pm$  s.e.m. (D) fat absorption was measured by fecal analysis (n=5 per each genotype). All values are given as mean  $\pm$  s.e.m. (E) Fat mass index (total fat mass/body weight) as measured by NMR spectroscopy for WT and SCID mice after 20 weeks on the respective diet (n=7-8 per genotype). All values are expressed as mean  $\pm$  s.e.m. Mann-Whitney Test: \*\*,  $p < 0.01$  between WT and SCID values. (F) Abdominal fat in WT and SCID fed HFD (for 3-4 months). (G) Epididymal fat (EWAT) mass of WT and SCID mice fed HFD relative to body weight (B.W.) (n=3 per genotype). All values are given as mean  $\pm$  s.e.m. \*\*,  $p < 0.01$  between WT and SCID values. (H) Lean mass index (lean mass/total body weight) of mice on HFD was measured by NMR spectroscopy (n=7). All values are given as mean  $\pm$  s.e.m. (I) Body weight of middle-age WT and SCID mice. (n=7-8 per genotype). All values are expressed as mean  $\pm$  s.e.m. Mann-Whitney Test: \*\*\*,  $p < 0.001$  between WT and SCID values. (J) Plasma concentrations of triacylglyceride for middle-age WT and SCID mice (6-10 per treatment group). All values are expressed as mean  $\pm$  s.e.m. Mann-Whitney Test: \*,  $p < 0.05$  between WT

and SCID values. (K) HOMA-IR for young (3 mo) and middle-age (14 mo) WT and SCID mice (n=6-10 per treatment group). All values are expressed as mean  $\pm$  s.e.m. Mann-Whitney Test: \*\*,  $p < 0.01$  between 3 mo and 14 mo values.

**Figure S7. Hyperinsulinemic-euglycemic clamp study performed on mice fed HFD ( $\pm$ DNA-PK inhibitor), Related to Figure 6**

(A) Time course of blood glucose level. (B) Time course of glucose infusion rate. (n=7-8). All values are given as mean  $\pm$  s.e.m. \*,  $p < 0.05$  (Two-way ANOVA) between the treatment groups. (C) Plasma concentrations of FFAs, triacylglyceride, glucose and insulin in WT and muscle specific DNA-PKcs knockout mice. (n=6-8 for each genotype). All values are given as mean  $\pm$  s.e.m.

Fig. S1 (Park)

|                      | ENT |   |   |   | 10 |   |   |   | 20 |   |   |   | 30 |   |   |   |   |   |   |   |   |   |   |   |   |   |   |   |   |   |   |   |   |   |   |
|----------------------|-----|---|---|---|----|---|---|---|----|---|---|---|----|---|---|---|---|---|---|---|---|---|---|---|---|---|---|---|---|---|---|---|---|---|---|
| Human HSP90 $\alpha$ | M   | P | E | E | T  | Q | T | Q | D  | Q | P | M | E  | E | E | E | V | E | T | F | A | F | Q | A | E | I | A | Q | L | M |   |   |   |   |   |
| Mouse HSP90 $\alpha$ | M   | P | E | E | T  | Q | T | Q | D  | Q | P | M | E  | E | E | E | V | E | T | F | A | F | Q | A | E | I | A | Q | L | M |   |   |   |   |   |
| Human HSP90 $\beta$  | M   | P | E | E | V  | H | H | G | -  | - | - | - | E  | E | E | V | E | T | F | A | F | Q | A | E | I | A | Q | L | M |   |   |   |   |   |   |
| Mouse HSP90 $\beta$  | M   | P | E | E | V  | H | H | G | -  | - | - | - | E  | E | E | V | E | T | F | A | F | Q | A | E | I | A | Q | L | M |   |   |   |   |   |   |
|                      | M   | P | E | E | -  | - | - | - | -  | - | - | - | -  | - | - | - | - | - | A | E | T | F | A | F | Q | A | E | I | A | Q | L | M |   |   |   |
| Yeast HSP82          |     |   |   |   |    |   |   |   |    |   |   |   |    |   |   |   |   |   | M | A | S | E | T | F | E | F | Q | A | E | I | T | Q | L | M |   |
| Yeast HSC82          |     |   |   |   |    |   |   |   |    |   |   |   |    |   |   |   |   |   | M | A | G | E | T | F | E | F | Q | A | E | I | T | Q | L | M |   |
| E. Coli HtpG         |     |   |   |   |    |   |   |   |    |   |   |   |    |   |   |   |   |   | M | K | G | Q | E | T | R | G | F | Q | S | E | V | K | Q | L | L |

Fig. S2 (Park)

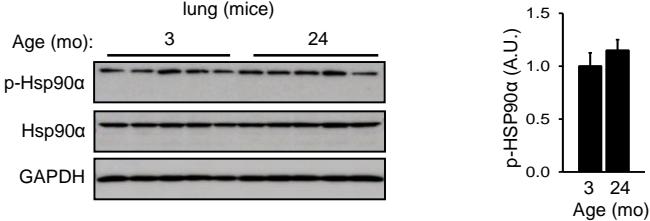

Figure S3 (Park)

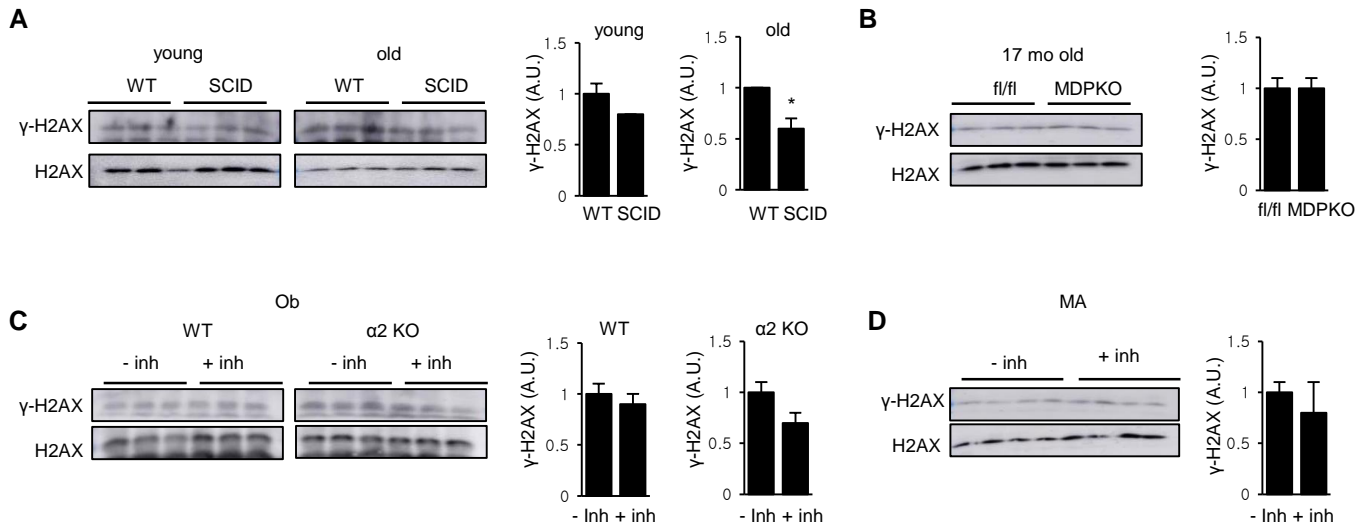

Figure S4 (Park)

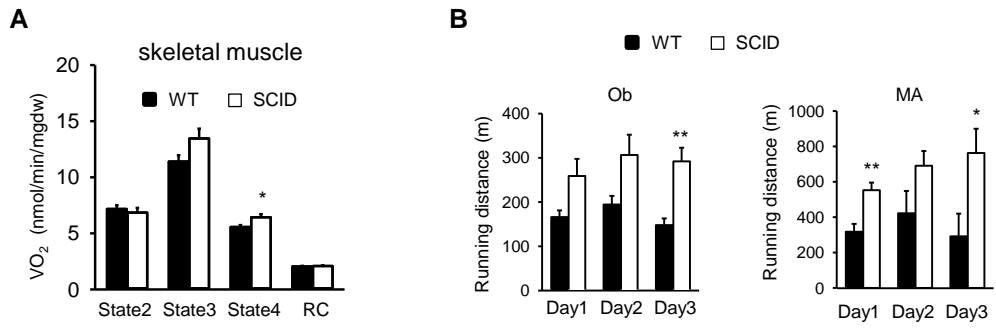

Figure S5 (Park)

**A**

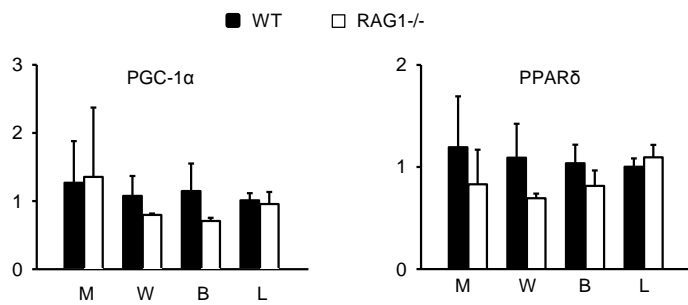

**B**

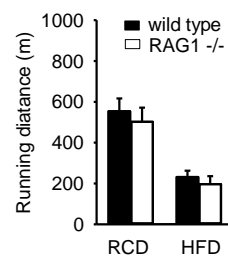



Figure S6 (Park)

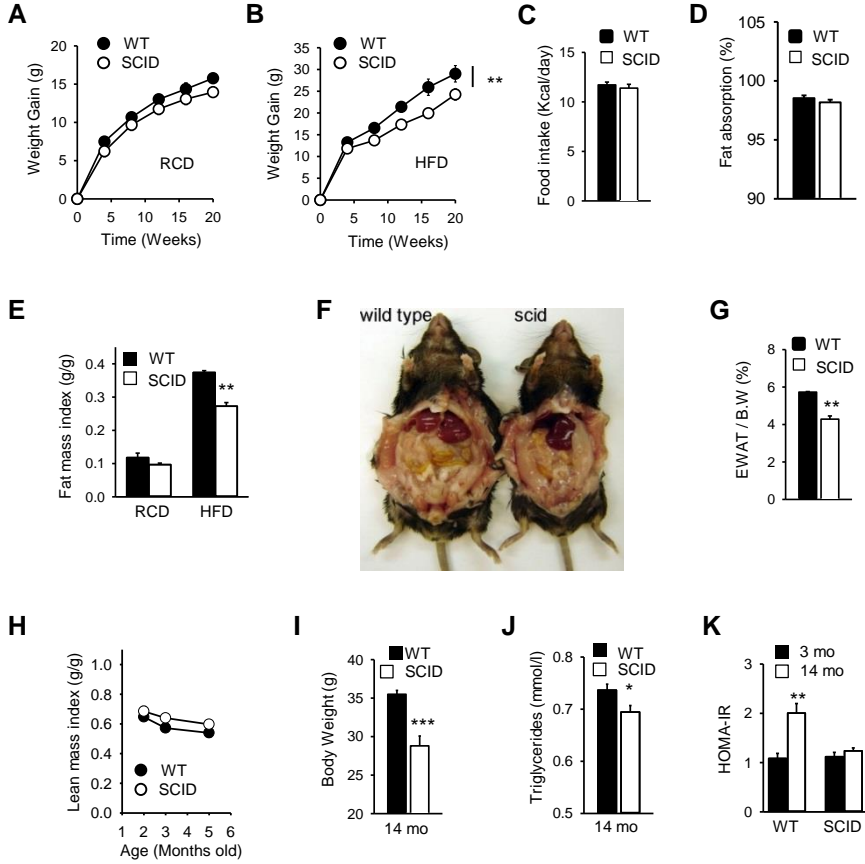

Figure S7 (Park)

A

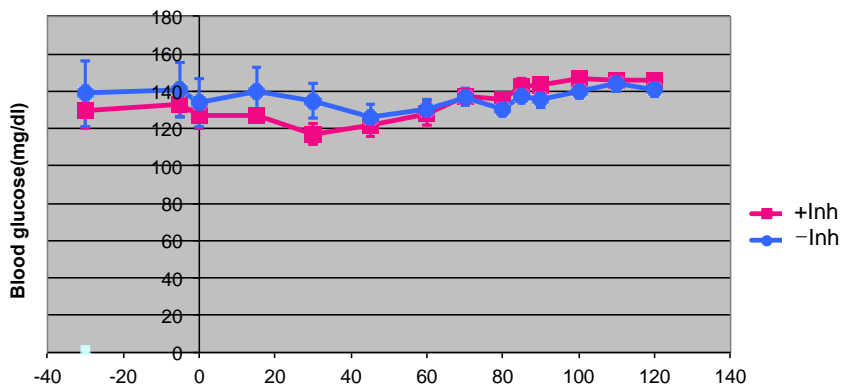

B

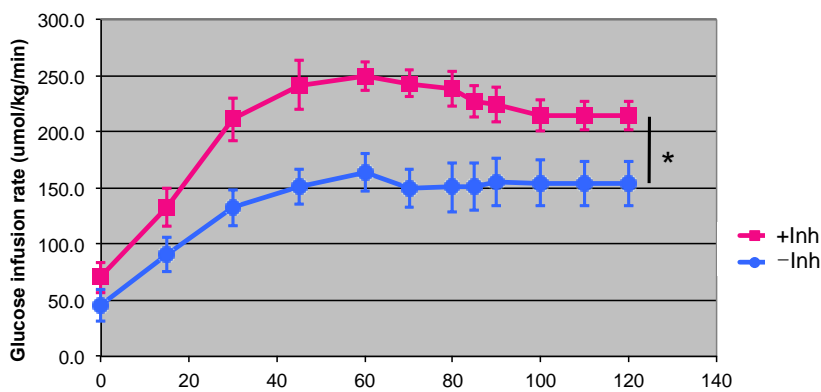

C

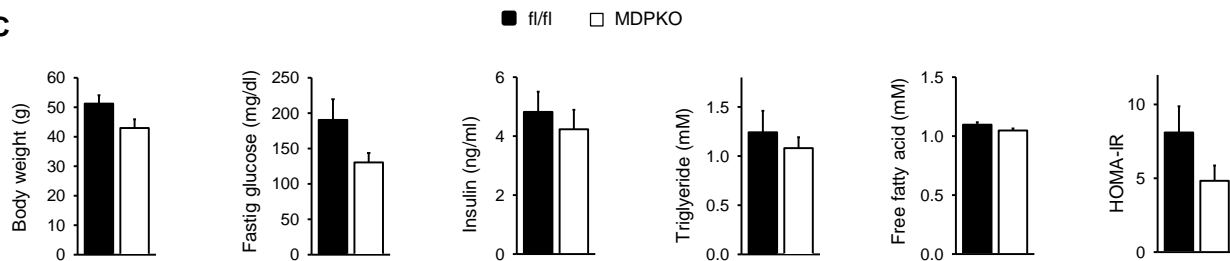

Supplement: NIHMS869428-supplement.pdf [file NIHMS869428-supplement.pdf]
